# Supplementary material for: A candidate gene based approach validates Md-PG1 as the main responsible for a QTL impacting fruit texture in apple (Malus x domesticaBorkh)
Source: Springer Nature journal article supplement (doi:10.1186/1471-2229-13-37), 2013-03-04
Supplement: 12870_2012_1238_MOESM11_ESM.pdf [file 12870_2012_1238_MOESM11_ESM.pdf]

|             |               |               |               |   |   |   |   |               |   |   |   |                      |
|-------------|---------------|---------------|---------------|---|---|---|---|---------------|---|---|---|----------------------|
| haplotype 1 | G             | A             | G             | T | T | C | T | C             | G | T | C | presence of allele 3 |
| haplotype 2 | T             | G             | G             | C | C | C | C | T             | A | C | T | absence of allele 3  |
| haplotype 3 | T             | G             | G             | C | C | C | T | T             | A | T | T | absence of allele 3  |
|             | ↓             | ↓             | ↓             |   |   |   |   | ↓             |   |   |   |                      |
|             | $\frac{V}{F}$ | $\frac{Q}{R}$ | $\frac{C}{R}$ |   |   |   |   | $\frac{A}{V}$ |   |   |   |                      |
