# Supplementary material for: A candidate gene based approach validates Md-PG1 as the main responsible for a QTL impacting fruit texture in apple (Malus x domesticaBorkh)
Source: Springer Nature journal article supplement (doi:10.1186/1471-2229-13-37), 2013-03-04

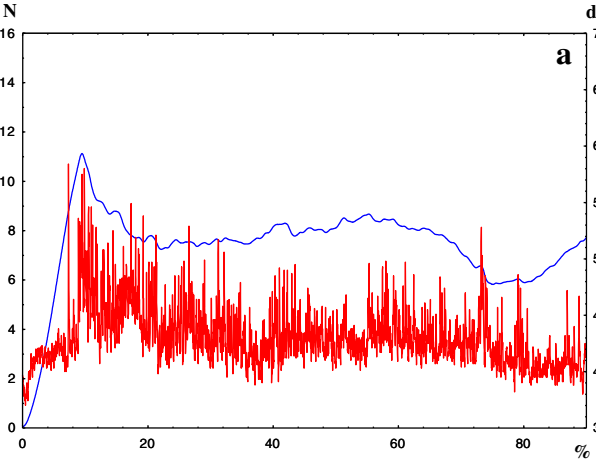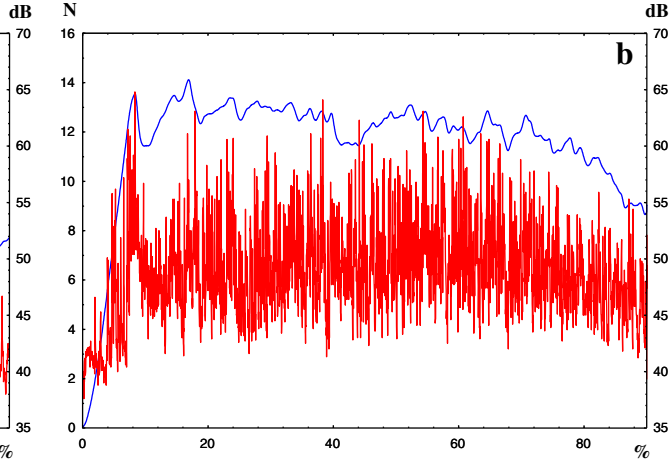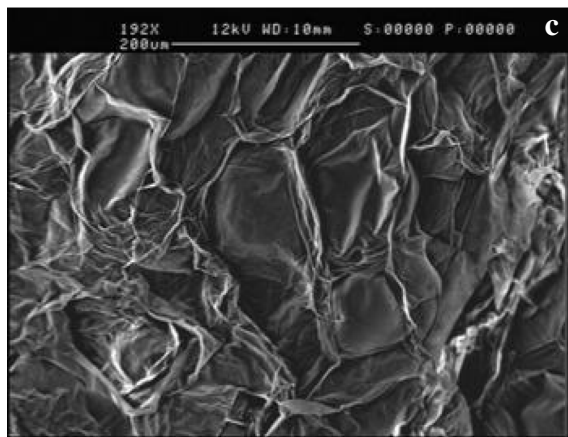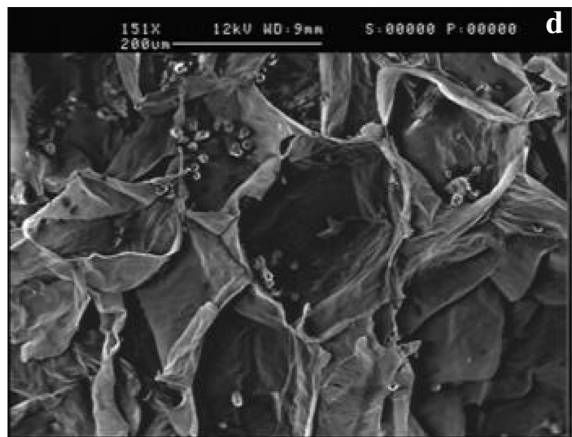

Supplement: 12870_2012_1238_MOESM13_ESM.pdf [file 12870_2012_1238_MOESM13_ESM.pdf]
